# Supplementary material for: Transcriptome Analysis Reveals Unfolded Protein Response Was Induced During the Early Stage of Burkholderia pseudomallei Infection in A549 Cells
Source: Front Genet. 2020 Dec 8;11:585203. doi: 10.3389/fgene.2020.585203 (PMC7753206; doi:10.3389/fgene.2020.585203)
Supplement: Supplementary Table 4 — Summary of significant differentially expressed genes at 12 hpi. [file Table_4.XLSX]

## Sheet: Sheet1
Probe Set ID	mRNA Accession	Gene Symbol	Gene Description	P-value	Foldchange(12hpi/0hpi)	0hpi_1	0hpi_2	0hpi_3	12hpi_1	12hpi_2	12hpi_3	style	mRNA Source	mRna - Description	Chromosome	Strand	Start	Stop
16833204	NM_002982	CCL2	chemokine (C-C motif) ligand 2	2.5877e-05	0.615737	5.77509	6.05699	6.08251	3.60775	3.72998	3.69295	down	RefSeq	Homo sapiens chemokine (C-C motif) ligand 2 (CCL2), mRNA	chr17	+	32582296	32584222
16800301	NM_005313	PDIA3	protein disulfide isomerase family A, member 3	0.00182257	0.605681	6.82298	6.62401	6.87291	4.52919	3.3972	4.38099	down	RefSeq	Homo sapiens protein disulfide isomerase family A, member 3 (PDIA3), mRNA	chr15	+	44038590	44065477
16819325	NM_014685	HERPUD1	homocysteine-inducible, endoplasmic reticulum stress-inducible, ubiquitin-like domain member 1	7.54546e-07	0.58027	8.72114	8.62851	8.7466	5.00784	5.16317	4.97186	down	RefSeq	Homo sapiens homocysteine-inducible, endoplasmic reticulum stress-inducible, ubiquitin-like domain member 1 (HERPUD1), transcript variant 1, mRNA	chr16	+	56965748	56977793
16901974	NM_000575	IL1A	interleukin 1, alpha	1.66953e-06	0.537939	6.87917	6.9404	6.86148	3.76429	3.57077	3.79008	down	RefSeq	Homo sapiens interleukin 1, alpha (IL1A), mRNA	chr2	-	113531492	113542971
17088760	NM_000962	PTGS1	prostaglandin-endoperoxide synthase 1 (prostaglandin G/H synthase and cyclooxygenase)	4.59405e-07	0.624659	6.95365	6.89376	6.99407	4.381	4.36153	4.27628	down	RefSeq	Homo sapiens prostaglandin-endoperoxide synthase 1 (prostaglandin G/H synthase and cyclooxygenase) (PTGS1), transcript variant 1, mRNA	chr9	+	125132824	125157982
16773478	NM_000982.3	RPL21	ribosomal protein L21	0.00186091	0.591412	6.38304	6.70614	6.92439	3.86984	3.40146	4.56497	down	RefSeq	Homo sapiens 60S ribosomal protein L21,mRNA	chr13	+	27827842	27829993
17063996	NM_001003702	ARHGEF35	Rho guanine nucleotide exchange factor (GEF) 35	0.000292211	0.649847	5.88338	6.20724	6.35331	3.78464	4.00988	4.19122	down	RefSeq	Homo sapiens Rho guanine nucleotide exchange factor (GEF) 35 (ARHGEF35), mRNA	chr7	-	143883176	143991230
16691121	NM_001010922	BCL2L15	BCL2-like 15	7.81264e-05	0.627541	6.72382	6.96144	6.78437	4.01415	4.37355	4.45783	down	RefSeq	Homo sapiens BCL2-like 15 (BCL2L15), mRNA	chr1	-	114419050	114430169
16775056	NM_001011724	HNRNPA1L2	heterogeneous nuclear ribonucleoprotein A1-like 2	9.52696e-06	0.51648	6.62796	6.45242	6.33025	3.3444	3.21894	3.46188	down	RefSeq	Homo sapiens heterogeneous nuclear ribonucleoprotein A1-like 2 (HNRNPA1L2), transcript variant 1, mRNA	chr13	+	53191605	53217919
16769481	NM_001034173	ALDH1L2	aldehyde dehydrogenase 1 family, member L2	9.14213e-06	0.664934	7.8961	7.75933	7.92005	5.3145	5.29176	5.06989	down	RefSeq	Homo sapiens aldehyde dehydrogenase 1 family, member L2 (ALDH1L2), nuclear gene encoding mitochondrial protein, transcript variant 1, mRNA	chr12	-	105413562	105478355
16945682	NM_001099	ACPP	acid phosphatase, prostate	5.97256e-05	0.577605	6.2072	6.49223	6.73468	3.75717	3.69242	3.77566	down	RefSeq	Homo sapiens acid phosphatase, prostate (ACPP), transcript variant 1, mRNA	chr3	+	132036211	132087146
16990718	NM_001127698	SPINK5	serine peptidase inhibitor, Kazal type 5	1.03759e-05	0.523224	7.249	7.20103	7.54934	3.92434	3.87716	3.7091	down	RefSeq	Homo sapiens serine peptidase inhibitor, Kazal type 5 (SPINK5), transcript variant 1, mRNA	chr5	+	147405246	147516925
16808324	NM_001130858.2	PPIP5K1	diphosphoinositol pentakisphosphate kinase 1	0.000340109	0.55747	6.45274	6.38008	6.40124	3.75664	3.08275	3.88303	down	RefSeq	Homo sapiens histidine acid phosphatase domain containing 2A, mRNA (cDNA clone MGC:51871 IMAGE:5521199), complete cds	chr15	-	43969216	43969298
16918679	NM_001145025.1	EDEM2	ER degradation enhancer, mannosidase alpha-like 2	0.000154381	0.612951	5.00104	4.66176	4.95707	2.83295	3.0075	3.12081	down	RefSeq	Homo sapiens cDNA FLJ60292 complete cds, highly similar to ER degradation-enhancingalpha-mannosidase-like 2 precursor	chr20	-	33859808	33859948
17058758	NM_001145064.2	GATSL2	GATS protein-like 2	0.000301663	0.583052	6.88224	6.80798	6.25313	3.6798	3.83159	4.11662	down	RefSeq	Homo sapiens GATS-like protein 2, mRNA (cDNA clone MGC:182133 IMAGE:9056958), complete cds	chr7	-	74807499	74867509
17060211	NM_001145715	KPNA7	karyopherin alpha 7 (importin alpha 8)	7.745e-05	0.595124	6.53957	6.78982	6.49869	4.12672	3.67784	3.9956	down	RefSeq	Homo sapiens karyopherin alpha 7 (importin alpha 8) (KPNA7), mRNA	chr7	-	98771197	98805129
17018720	NM_001162900	TMEM217	transmembrane protein 217	5.73287e-06	0.550802	5.92793	6.13457	5.85557	3.28042	3.28224	3.30665	down	RefSeq	Homo sapiens transmembrane protein 217 (TMEM217), transcript variant 2, mRNA	chr6	-	37179954	37225931
16957479	NM_001164496	WDR52	WD repeat domain 52	0.000876876	0.575681	5.304	5.28767	5.35367	2.92432	3.54855	2.70655	down	RefSeq	Homo sapiens WD repeat domain 52 (WDR52), transcript variant 1, mRNA	chr3	-	113005744	113160457
16683470	NM_001191005.2	SRSF10	serine/arginine-rich splicing factor 10	0.000413291	0.632847	7.69289	7.81527	7.42735	4.98221	4.38299	5.14946	down	RefSeq	Homo sapiens FUS interacting protein (serine/arginine-rich) 1, mRNA (cDNA clone IMAGE:5275698), complete cds	chr1	-	24291294	24307417
16874012	NM_001217	CA11	carbonic anhydrase XI	3.88987e-05	0.554498	7.51464	7.8163	8.06952	4.47036	4.25966	4.24548	down	RefSeq	Homo sapiens carbonic anhydrase XI (CA11), mRNA	chr19	-	49141272	49149451
16840599	NM_001307	CLDN7	claudin 7	4.11829e-07	0.474769	7.09017	7.11443	7.19128	3.32692	3.49063	3.34055	down	RefSeq	Homo sapiens claudin 7 (CLDN7), transcript variant 1, mRNA	chr17	-	7163222	7166512
16690139	NM_001439	EXTL2	exostoses (multiple)-like 2	0.000118088	0.622695	6.14577	6.35888	6.41906	3.7476	4.19558	3.84053	down	RefSeq	Homo sapiens exostoses (multiple)-like 2 (EXTL2), transcript variant 1, mRNA	chr1	-	101337941	101361554
16773662	NM_001629	ALOX5AP	arachidonate 5-lipoxygenase-activating protein	2.29677e-05	0.543725	7.81715	7.95491	8.12867	4.5124	4.07052	4.41252	down	RefSeq	Homo sapiens arachidonate 5-lipoxygenase-activating protein (ALOX5AP), mRNA	chr13	+	31287615	31338565
16752715	NM_002332	LRP1	low density lipoprotein receptor-related protein 1	8.66866e-07	0.609609	7.0233	6.91686	6.9501	4.31744	4.16957	4.24788	down	RefSeq	Homo sapiens low density lipoprotein receptor-related protein 1 (LRP1), mRNA	chr12	+	57522276	57607142
16852812	NM_002639	SERPINB5	serpin peptidase inhibitor, clade B (ovalbumin), member 5	2.49402e-06	0.653731	5.89234	5.81299	5.90142	3.82554	3.7678	3.91674	down	RefSeq	Homo sapiens serpin peptidase inhibitor, clade B (ovalbumin), member 5 (SERPINB5), mRNA	chr18	+	61143994	61172318
16961551	NM_002662	PLD1	phospholipase D1, phosphatidylcholine-specific	1.49955e-05	0.66555	7.40109	7.31893	7.4314	4.73496	4.96435	5.04358	down	RefSeq	Homo sapiens phospholipase D1, phosphatidylcholine-specific (PLD1), transcript variant 1, mRNA	chr3	-	171318195	171528740
16837348	NM_002758	MAP2K6	mitogen-activated protein kinase kinase 6	5.66149e-07	0.646763	7.15063	7.27044	7.18689	4.64997	4.70892	4.61634	down	RefSeq	Homo sapiens mitogen-activated protein kinase kinase 6 (MAP2K6), mRNA	chr17	+	67410838	67538470
17005787	NM_003509.2	HIST1H2AG	histone cluster 1, H2ag	2.76517e-05	0.604437	6.84284	7.02139	6.78326	4.24176	3.9527	4.28564	down	RefSeq	Homo sapiens histone cluster 1, H2ag, mRNA (cDNA clone MGC:17204 IMAGE:4342191), complete cds	chr6	+	27100817	27103070
16670681	NM_003568	ANXA9	annexin A9	1.51904e-06	0.415657	6.89651	6.93241	6.80435	3.01354	2.73561	2.82722	down	RefSeq	Homo sapiens annexin A9 (ANXA9), mRNA	chr1	+	150954493	150968114
16782548	NM_004563	PCK2	phosphoenolpyruvate carboxykinase 2 (mitochondrial)	9.78518e-05	0.559977	5.9352	6.14191	5.97558	3.56824	3.0594	3.48145	down	RefSeq	Homo sapiens phosphoenolpyruvate carboxykinase 2 (mitochondrial) (PCK2), nuclear gene encoding mitochondrial protein, transcript variant 1, mRNA	chr14	+	24563262	24579807
16960752	NM_004733	SLC33A1	solute carrier family 33 (acetyl-CoA transporter), member 1	6.00896e-05	0.665288	6.14444	6.22043	6.13921	3.89647	4.12531	4.28876	down	RefSeq	Homo sapiens solute carrier family 33 (acetyl-CoA transporter), member 1 (SLC33A1), transcript variant 1, mRNA	chr3	-	155544300	155572248
17093245	NM_004925	AQP3	aquaporin 3 (Gill blood group)	1.36069e-05	0.592746	6.41225	6.48541	6.49709	3.99173	3.65104	3.8534	down	RefSeq	Homo sapiens aquaporin 3 (Gill blood group) (AQP3), mRNA	chr9	-	33441152	33447631
16683105	NM_005529	HSPG2	heparan sulfate proteoglycan 2	8.12796e-07	0.641878	7.21758	7.22208	7.25027	4.73004	4.56266	4.62958	down	RefSeq	Homo sapiens heparan sulfate proteoglycan 2 (HSPG2), mRNA	chr1	-	22148737	22263790
16704464	NM_005972	PPYR1	pancreatic polypeptide receptor 1	1.79787e-05	0.618801	5.94622	5.80633	6.07715	3.76202	3.57954	3.69147	down	RefSeq	Homo sapiens pancreatic polypeptide receptor 1 (PPYR1), mRNA	chr10	+	47083534	47088320
16975226	NM_006068	TLR6	toll-like receptor 6	7.09814e-05	0.543185	6.80317	6.2988	6.26673	3.51141	3.52053	3.48886	down	RefSeq	Homo sapiens toll-like receptor 6 (TLR6), mRNA	chr4	-	38825325	38858438
17101737	NM_007220.3	CA5B	carbonic anhydrase VB, mitochondrial	1.49205e-06	0.641126	5.67225	5.64716	5.70337	3.60154	3.72265	3.58956	down	RefSeq	Uncharacterized protein gene:ENSG00000169239	chrX	+	15739620	15739715
16751190	NM_014033	METTL7A	methyltransferase like 7A	1.27294e-06	0.666353	8.74715	8.79852	8.80453	5.97334	5.79202	5.79317	down	RefSeq	Homo sapiens methyltransferase like 7A (METTL7A), mRNA	chr12	+	51317255	51326300
16814988	NM_014353	RAB26	RAB26, member RAS oncogene family	2.27704e-05	0.570265	7.2111	7.03861	7.46002	4.07352	4.054	4.25279	down	RefSeq	Homo sapiens RAB26, member RAS oncogene family (RAB26), mRNA	chr16	+	2198145	2204141
16749365	NM_015633	FGFR1OP2	FGFR1 oncogene partner 2	0.000829329	0.632405	4.62444	5.08399	5.27494	3.03735	3.18898	3.24923	down	RefSeq	Homo sapiens FGFR1 oncogene partner 2 (FGFR1OP2), transcript variant 1, mRNA	chr12	+	27091305	27119583
17022736	NM_016262	TUBE1	tubulin, epsilon 1	0.000115856	0.572608	5.0679	5.41597	5.3874	2.90595	3.23117	2.9509	down	RefSeq	Homo sapiens tubulin, epsilon 1 (TUBE1), mRNA	chr6	-	112391860	112408751
17105706	NM_016303	WBP5	WW domain binding protein 5	1.12014e-05	0.659094	7.6715	7.65272	7.64578	5.13604	4.85382	5.14952	down	RefSeq	Homo sapiens WW domain binding protein 5 (WBP5), transcript variant 1, mRNA	chrX	+	102611373	102613397
16863593	NM_018485	GPR77	G protein-coupled receptor 77	0.000178619	0.632794	5.56648	5.53834	5.20374	3.57112	3.48761	3.26123	down	RefSeq	Homo sapiens G protein-coupled receptor 77 (GPR77), mRNA	chr19	+	47840371	47845272
16996771	NM_019072	SGTB	small glutamine-rich tetratricopeptide repeat (TPR)-containing, beta	4.41089e-05	0.55858	5.78656	6.10338	6.038	3.42422	3.14145	3.44852	down	RefSeq	Homo sapiens small glutamine-rich tetratricopeptide repeat (TPR)-containing, beta (SGTB), mRNA	chr5	-	64961755	65018862
16998850	NM_022140	EPB41L4A	erythrocyte membrane protein band 4.1 like 4A	3.76949e-07	0.55669	7.61902	7.59889	7.71596	4.33474	4.22234	4.20998	down	RefSeq	Homo sapiens erythrocyte membrane protein band 4	chr5	-	111478138	111755013
16892246	NM_031313	ALPPL2	alkaline phosphatase, placental-like 2	0.00025133	0.642727	8.47478	8.69908	8.53127	5.13695	5.42844	5.95599	down	RefSeq	Homo sapiens alkaline phosphatase, placental-like 2 (ALPPL2), mRNA	chr2	+	233271552	233275451
16687985	NM_032027	TM2D1	TM2 domain containing 1	0.000149255	0.593426	6.71067	6.21822	6.58796	3.72565	3.76352	4.09263	down	RefSeq	Homo sapiens TM2 domain containing 1 (TM2D1), mRNA	chr1	-	62146717	62191095
16749875	NM_032834	ALG10	asparagine-linked glycosylation 10, alpha-1,2-glucosyltransferase homolog (S. pombe)	2.75343e-05	0.646863	5.50795	5.39369	5.66878	3.54154	3.51943	3.65782	down	RefSeq	Homo sapiens asparagine-linked glycosylation 10, alpha-1,2-glucosyltransferase homolog (S. pombe) (ALG10), mRNA.	chr12	+	34175216	34182629
17070381	NM_033402	LRRCC1	leucine rich repeat and coiled-coil domain containing 1	0.00123561	0.638074	6.52349	6.10347	6.73741	4.28384	3.6864	4.38566	down	RefSeq	Homo sapiens leucine rich repeat and coiled-coil domain containing 1 (LRRCC1), mRNA	chr8	+	86019323	86058315
16743912	NM_052889	CARD16	caspase recruitment domain family, member 16	4.1708e-05	0.65043	6.26047	6.2037	6.2611	3.87539	4.0453	4.25878	down	RefSeq	Homo sapiens caspase recruitment domain family, member 16 (CARD16), transcript variant 2, mRNA	chr11	-	104912053	104972158
16975634	NM_130902.2	COX7B2	cytochrome c oxidase subunit VIIb2	5.60702e-05	0.634733	5.77206	5.85558	5.59128	3.60246	3.80918	3.51777	down	RefSeq	Cytochrome c oxidase subunit 7B2	chr4	-	46736844	46911252
16946077	NM_144717	IL20RB	interleukin 20 receptor beta	3.31764e-06	0.610902	8.73708	8.61299	8.72801	5.41326	5.37235	5.14554	down	RefSeq	Homo sapiens interleukin 20 receptor beta (IL20RB), mRNA	chr3	+	136676707	136729927
17093463	NM_147164	CNTFR	ciliary neurotrophic factor receptor	0.000222969	0.632347	5.05052	5.0104	5.25809	3.45071	3.01208	3.22413	down	RefSeq	Homo sapiens ciliary neurotrophic factor receptor (CNTFR), transcript variant 1, mRNA	chr9	-	34551430	34590138
16871765	NM_152279	ZNF585B	zinc finger protein 585B	0.000153336	0.605929	6.46138	6.5721	6.80331	4.18358	3.69268	4.14342	down	RefSeq	Homo sapiens zinc finger protein 585B (ZNF585B), mRNA	chr19	-	37672481	37709055
17059776	NM_152703	SAMD9L	sterile alpha motif domain containing 9-like	0.00014044	0.631745	6.65411	6.96372	6.70266	4.39699	3.98859	4.45177	down	RefSeq	Homo sapiens sterile alpha motif domain containing 9-like (SAMD9L), mRNA	chr7	-	92759368	92777682
16860159	NM_182515	ZNF714	zinc finger protein 714	2.87598e-05	0.636495	5.14597	5.31466	5.33397	3.47596	3.24574	3.33148	down	RefSeq	Homo sapiens zinc finger protein 714 (ZNF714), mRNA	chr19	+	21264953	21307897
16977970	NM_198281	GPRIN3	GPRIN family member 3	1.66959e-05	0.584167	5.88949	5.74057	6.04018	3.54046	3.37372	3.40819	down	RefSeq	Homo sapiens GPRIN family member 3 (GPRIN3), mRNA	chr4	-	90165429	90229161
16721585	NM_198474	OLFML1	olfactomedin-like 1	6.6174e-05	0.621127	7.03514	7.05416	7.18922	4.59637	4.11422	4.50607	down	RefSeq	Homo sapiens olfactomedin-like 1 (OLFML1), mRNA	chr11	+	7506600	7532608
16923145	NM_207627	ABCG1	ATP-binding cassette, sub-family G (WHITE), member 1	0.000141508	0.583785	6.04288	6.3464	6.31831	3.73855	3.8451	3.33755	down	RefSeq	Homo sapiens ATP-binding cassette, sub-family G (WHITE), member 1 (ABCG1), transcript variant 5, mRNA	chr21	+	43619799	43720714
16930299	NM_001675	ATF4	activating transcription factor 4 (tax-responsive enhancer element B67)	5.71201e-06	1.71479	4.59215	4.5944	4.30223	7.69785	7.76086	7.6718	up	RefSeq	Homo sapiens activating transcription factor 4 (tax-responsive enhancer element B67) (ATF4), transcript variant 1, mRNA	chr22	+	39915700	39918691
16799315	NM_003246	THBS1	thrombospondin 1	3.88361e-06	1.9589	3.49455	3.72491	3.519	7.11692	6.89434	7.02435	up	RefSeq	Homo sapiens thrombospondin 1 (THBS1), mRNA	chr15	+	39873280	39891667
16785631	NM_004094	EIF2S1	eukaryotic translation initiation factor 2, subunit 1 alpha, 35kDa	3.91923e-06	1.7099	4.30102	4.60608	4.40585	7.57939	7.59926	7.58515	up	RefSeq	Homo sapiens eukaryotic translation initiation factor 2, subunit 1 alpha, 35kDa (EIF2S1), mRNA	chr14	+	67826714	67853233
17098411	NM_005347	HSPA5	heat shock 70kDa protein 5 (glucose-regulated protein, 78kDa)	4.09917e-07	1.54046	6.63701	6.64984	6.75405	10.3202	10.2022	10.35	up	RefSeq	Homo sapiens heat shock 70kDa protein 5 (glucose-regulated protein, 78kDa) (HSPA5), mRNA	chr9	-	127997127	128003666
16797417	AK301389	IGHV4-31	immunoglobulin heavy variable 4-31	1.698e-05	1.66323	5.12238	4.99348	4.79281	8.42189	8.09135	8.28327	up	GenBank	Homo sapiens cDNA FLJ56881 complete cds, highly similar to Ig gamma-1 chain C region	chr14	-	106331409	106331460
16927812	ENST00000390311	IGLV3-16	immunoglobulin lambda variable 3-16	0.00574852	1.52385	4.08681	3.32445	3.16613	5.25318	5.74859	5.11661	up	ENSEMBL	V2-11 protein gene:ENSG00000211665	chr22	+	23089870	23090398
16751381	NM_000020	ACVRL1	activin A receptor type II-like 1	0.000270132	1.51919	3.66053	3.26993	3.41497	5.3563	5.30931	5.05105	up	RefSeq	Homo sapiens activin A receptor type II-like 1 (ACVRL1), transcript variant 1, mRNA	chr12	+	52300692	52317145
16858137	NM_000201	ICAM1	intercellular adhesion molecule 1	4.22689e-07	1.5031	4.59957	4.55235	4.65044	6.91445	6.87275	6.95906	up	RefSeq	Homo sapiens intercellular adhesion molecule 1 (ICAM1), mRNA	chr19	+	10381517	10397291
17044177	NM_000600	IL6	interleukin 6 (interferon, beta 2)	1.07005e-05	2.12144	2.59096	2.52455	2.43908	5.28076	5.21972	5.52609	up	RefSeq	Homo sapiens interleukin 6 (interferon, beta 2) (IL6), mRNA	chr7	+	22765503	22771621
16719905	NM_001012508	SPRN	shadow of prion protein homolog (zebrafish)	0.00151353	1.50027	4.05694	3.72409	3.41052	5.48198	5.90076	5.40757	up	RefSeq	Homo sapiens shadow of prion protein homolog (zebrafish) (SPRN), mRNA	chr10	-	135234170	135382916
17057478	NM_001013398	IGFBP3	insulin-like growth factor binding protein 3	1.70013e-05	1.62744	4.27435	4.31621	4.0156	6.93741	6.75089	6.82749	up	RefSeq	Homo sapiens insulin-like growth factor binding protein 3 (IGFBP3), transcript variant 1, mRNA	chr7	-	45951844	45961473
16958532	NM_001015050.2	ALG1L	asparagine-linked glycosylation 1-like	1.80019e-05	1.73333	3.38048	3.39293	3.25527	5.95852	5.63879	5.78572	up	RefSeq	Putative glycosyltransferase ALG1-like gene:ENSG00000189366	chr3	-	125648118	125655887
17001654	NM_001025159	CD74	CD74 molecule, major histocompatibility complex, class II invariant chain	8.33617e-05	1.69779	3.73408	4.02191	3.56881	6.22387	6.48511	6.51814	up	RefSeq	Homo sapiens CD74 molecule, major histocompatibility complex, class II invariant chain (CD74), transcript variant 1, mRNA	chr5	-	149781200	149792499
16681862	NM_001039361	PRAMEF10	PRAME family member 10	5.06155e-06	1.53175	4.32694	4.47027	4.23301	6.67591	6.65023	6.63295	up	RefSeq	Homo sapiens PRAME family member 10 (PRAMEF10), mRNA	chr1	-	12952727	12958101
16708623	NM_001077494	NFKB2	nuclear factor of kappa light polypeptide gene enhancer in B-cells 2 (p49/p100)	5.34509e-07	1.6406	4.6973	4.82653	4.67107	7.7908	7.77541	7.72189	up	RefSeq	Homo sapiens nuclear factor of kappa light polypeptide gene enhancer in B-cells 2 (p49/p100) (NFKB2), transcript variant 1, mRNA	chr10	+	104154229	104162281
16880277	NM_001080433	CCDC85A	coiled-coil domain containing 85A	0.000297519	1.82506	3.57632	3.34225	3.68209	6.90093	6.24317	6.20277	up	RefSeq	Homo sapiens coiled-coil domain containing 85A (CCDC85A), mRNA	chr2	+	56411258	56613309
16731401	NM_001101389	CLDN25	claudin 25	0.00013455	1.74146	3.76408	3.32956	3.54164	5.99155	6.43097	6.0984	up	RefSeq	Homo sapiens claudin 25 (CLDN25), mRNA	chr11	+	113650469	113651222
16875741	NM_001145402.1	FAM71E2	family with sequence similarity 71, member E2	0.000673193	1.6327	4.04535	3.5812	3.39744	6.29354	5.81087	5.89444	up	RefSeq	Homo sapiens family with sequence similarity 71, member E2, mRNA (cDNA clone IMAGE:5165573), complete cds	chr19	-	55866276	55874620
16917963	NM_001322	CST2	cystatin SA	3.08232e-05	1.61041	4.64491	4.33064	4.58384	7.30734	7.41855	7.11022	up	RefSeq	Homo sapiens cystatin SA (CST2), mRNA	chr20	-	23804404	23807368
17023646	NM_001901	CTGF	connective tissue growth factor	2.19276e-06	1.71566	4.49312	4.28432	4.38095	7.61561	7.45083	7.50887	up	RefSeq	Homo sapiens connective tissue growth factor (CTGF), mRNA	chr6	-	132269316	132272518
16665932	NM_001924	GADD45A	growth arrest and DNA-damage-inducible, alpha	2.82387e-06	1.69422	4.02999	3.89485	3.84242	6.70177	6.5577	6.67688	up	RefSeq	Homo sapiens growth arrest and DNA-damage-inducible, alpha (GADD45A), mRNA	chr1	+	68150744	68154021
16689869	NM_001993	F3	coagulation factor III (thromboplastin, tissue factor)	1.45516e-06	2.10796	3.7959	3.97687	3.93057	8.29033	8.06564	8.31422	up	RefSeq	Homo sapiens coagulation factor III (thromboplastin, tissue factor) (F3), transcript variant 1, mRNA	chr1	-	94994732	95007413
16743647	NM_002423	MMP7	matrix metallopeptidase 7 (matrilysin, uterine)	5.17424e-06	1.94358	3.49946	3.60243	3.68242	7.15121	6.84577	6.96316	up	RefSeq	Homo sapiens matrix metallopeptidase 7 (matrilysin, uterine) (MMP7), mRNA	chr11	-	102391239	102401484
16685139	NM_002794.4	PSMB2	proteasome (prosome, macropain) subunit, beta type, 2	4.54831e-05	1.8389	4.30598	4.30483	3.85548	7.68107	7.80231	7.44095	up	RefSeq	Homo sapiens mRNA for proteasome beta 2 subunit variant protein	chr1	-	36035414	36043330
16926029	NM_003226	TFF3	trefoil factor 3 (intestinal)	0.000580059	1.62067	4.44038	4.28816	3.88468	6.50469	7.19979	6.73734	up	RefSeq	Homo sapiens trefoil factor 3 (intestinal) (TFF3), mRNA	chr21	-	43731777	43735761
17002898	NM_003714	STC2	stanniocalcin 2	1.75181e-07	2.43687	3.07559	3.10638	2.92529	7.38221	7.41926	7.39176	up	RefSeq	Homo sapiens stanniocalcin 2 (STC2), mRNA	chr5	-	172741716	172756506
16856906	NM_003775	S1PR4	sphingosine-1-phosphate receptor 4	0.000356359	1.61852	4.61122	4.32641	4.18402	7.20733	7.35283	6.67745	up	RefSeq	Homo sapiens sphingosine-1-phosphate receptor 4 (S1PR4), mRNA	chr19	+	3178736	3180330
16740630	NM_005438	FOSL1	FOS-like antigen 1	4.06568e-06	1.98535	3.25302	3.39136	3.51687	6.69165	6.64426	6.83769	up	RefSeq	Homo sapiens FOS-like antigen 1 (FOSL1), mRNA	chr11	-	65659490	65668044
16951191	NM_005677	COLQ	collagen-like tail subunit (single strand of homotrimer) of asymmetric acetylcholinesterase	0.000259663	1.65408	4.1821	4.15395	3.75259	6.46892	6.99472	6.53191	up	RefSeq	Homo sapiens collagen-like tail subunit (single strand of homotrimer) of asymmetric acetylcholinesterase (COLQ), transcript variant I, mRNA	chr3	-	15491640	15563258
16819264	NM_005952	MT1X	metallothionein 1X	2.80062e-07	1.87675	4.39916	4.3373	4.41921	8.15406	8.20929	8.32661	up	RefSeq	Homo sapiens metallothionein 1X (MT1X), mRNA	chr16	+	56716336	56718108
16734199	NM_005961	MUC6	mucin 6, oligomeric mucus	0.000928711	1.54406	4.3525	4.33166	3.80726	6.64989	6.05841	6.57922	up	RefSeq	Homo sapiens mucin 6, oligomeric mucus/gel-forming (MUC6), mRNA	chr11	-	1012821	1036706
17012946	NM_006290	TNFAIP3	tumor necrosis factor, alpha-induced protein 3	3.10581e-07	2.32311	2.7132	2.88789	2.79513	6.47811	6.54977	6.47745	up	RefSeq	Homo sapiens tumor necrosis factor, alpha-induced protein 3 (TNFAIP3), mRNA	chr6	+	138188351	138204449
16660713	NM_007260.2	LYPLA2	lysophospholipase II	3.13341e-06	1.6849	4.33799	4.55297	4.38002	7.42864	7.54651	7.38519	up	RefSeq	Acyl-protein thioesterase 2 gene:ENSG00000011009	chr1	+	24117460	24122029
16716478	NM_014391	ANKRD1	ankyrin repeat domain 1 (cardiac muscle)	3.32547e-05	2.17867	2.73475	2.90789	3.01211	6.00161	6.47537	6.37885	up	RefSeq	Homo sapiens ankyrin repeat domain 1 (cardiac muscle) (ANKRD1), mRNA	chr10	-	92671853	92681033
17008720	NM_018960	GNMT	glycine N-methyltransferase	0.000341803	1.73393	4.08126	4.38794	3.64764	7.24724	6.73604	7.02644	up	RefSeq	Homo sapiens glycine N-methyltransferase (GNMT), mRNA	chr6	+	42928496	42931618
16872430	NM_020956	PRX	periaxin	0.00163825	1.54184	4.00961	3.82276	3.48722	5.97771	6.09809	5.37714	up	RefSeq	Homo sapiens periaxin (PRX), transcript variant 1, mRNA	chr19	-	40899671	40919273
16870594	NM_023002	HAPLN4	hyaluronan and proteoglycan link protein 4	1.88738e-05	1.78786	4.68217	4.62125	4.33952	8.03308	8.01147	8.34714	up	RefSeq	Homo sapiens hyaluronan and proteoglycan link protein 4 (HAPLN4), mRNA	chr19	-	19366450	19373596
16982828	NM_024337	IRX1	iroquois homeobox 1	0.000258598	1.51901	3.65639	3.79869	3.8736	5.48521	5.99557	5.72762	up	RefSeq	Homo sapiens iroquois homeobox 1 (IRX1), mRNA	chr5	+	3596168	3601517
17003320	NM_024872	DOK3	docking protein 3	0.000345522	1.635	4.33862	3.83427	4.09612	6.67746	6.99748	6.38486	up	RefSeq	Homo sapiens docking protein 3 (DOK3), transcript variant 1, mRNA	chr5	-	176928905	176938275
16732676	NM_032873	UBASH3B	ubiquitin associated and SH3 domain containing B	0.00347134	2.14544	3.95203	2.02867	3.07831	6.52157	6.3609	6.55307	up	RefSeq	Homo sapiens ubiquitin associated and SH3 domain containing B (UBASH3B), mRNA	chr11	+	122526383	122685187
16940233	NM_147196	TMIE	transmembrane inner ear	1.26909e-05	1.61279	3.32793	3.56018	3.55048	5.63866	5.55216	5.64446	up	RefSeq	Homo sapiens transmembrane inner ear (TMIE), mRNA	chr3	+	46742823	46752413
16872648	NM_152296	ATP1A3	ATPase, Na+/K+ transporting, alpha 3 polypeptide	0.000893017	1.64847	3.53069	3.44516	2.87508	5.52495	5.54813	5.16586	up	RefSeq	Homo sapiens ATPase, Na+/K+ transporting, alpha 3 polypeptide (ATP1A3), mRNA	chr19	-	42470734	42498384
16898567	NM_182536	GKN2	gastrokine 2	9.13245e-05	2.20074	2.84159	3.3817	2.74491	6.5459	6.78034	6.41042	up	RefSeq	Homo sapiens gastrokine 2 (GKN2), mRNA	chr2	-	69172364	69180102
16820655	NM_182619	CLEC18A	C-type lectin domain family 18, member A	0.0050169	1.67377	3.87273	3.4766	2.66684	5.85082	5.69342	5.22051	up	RefSeq	Homo sapiens C-type lectin domain family 18, member A (CLEC18A), transcript variant 1, mRNA	chr16	+	69984810	69998141
16691214	NM_198459	DENND2C	DENN	7.16611e-05	1.77558	4.07096	4.6802	4.51634	7.82882	8.01789	7.71079	up	RefSeq	Homo sapiens DENN/MADD domain containing 2C (DENND2C), mRNA	chr1	-	115125469	115213043
